# Supplementary material
Source: Springer Nature journal article supplement (https://www.springermedizin.de/resource/supplementary/12933_2010_265_MOESM3_ESM.pdf/9539970)

# p-4EBP1

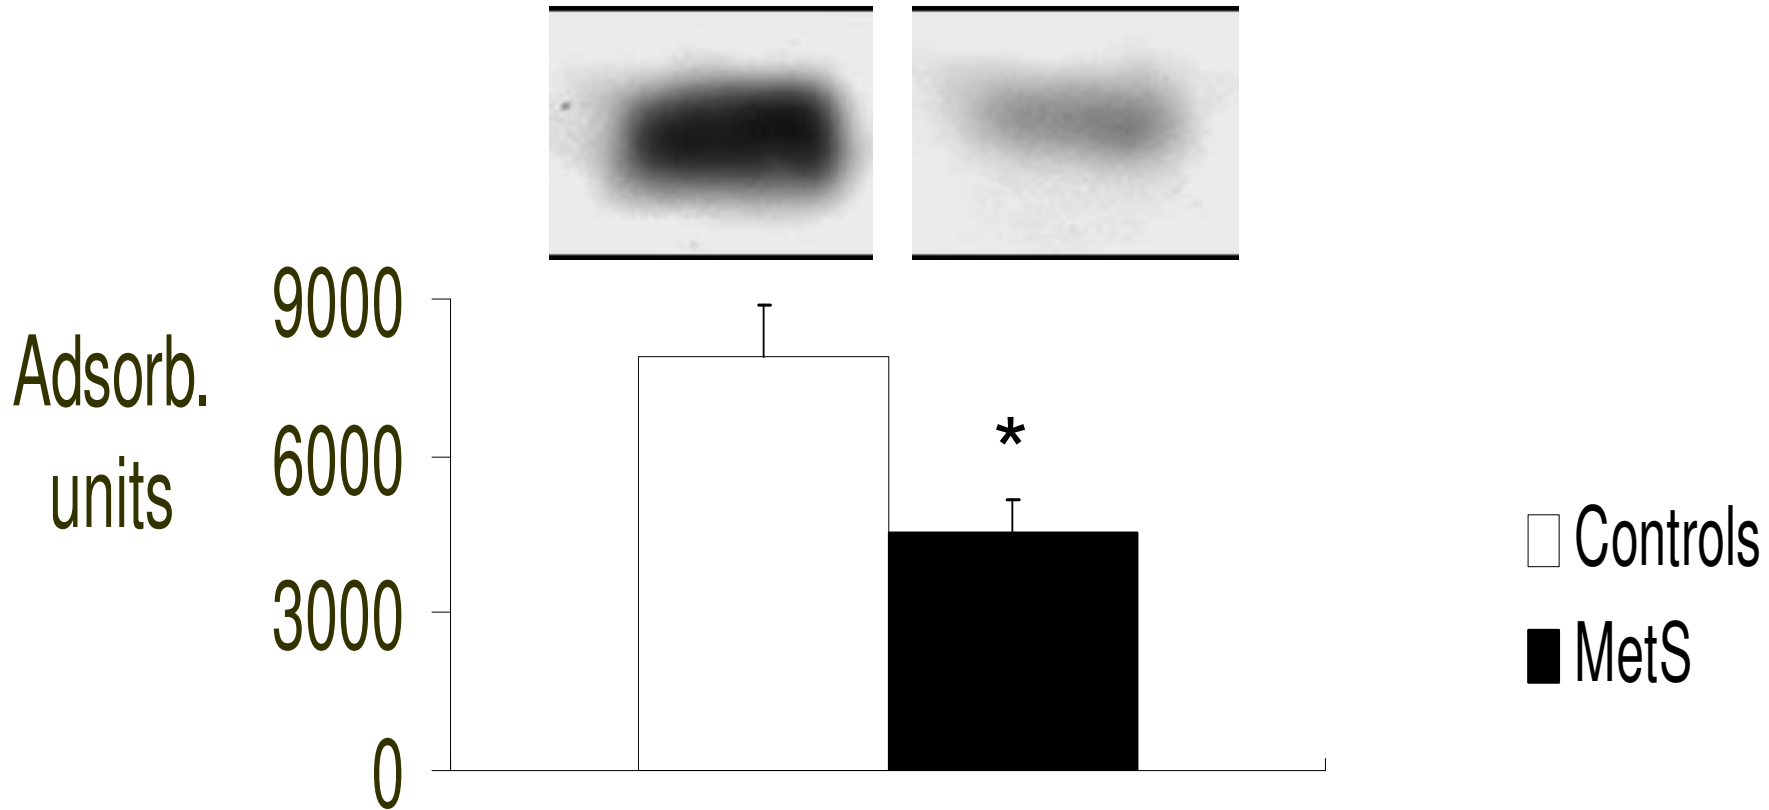

Supplement: MOESM3 [file 9539970]
